# Supplementary material
Source: PubMed Central journal article supplement (PMC5824303)
Supplement: jamaotolaryngolheadnecksurg-143-1173-s001.pdf [file jamaotolaryngolheadnecksurg-143-1173-s001.pdf]

## Supplementary Online Content

Karadaghy OA, Kallogjeri D, Piccirillo JF. Development and validation of a new clinical severity staging system for patients with nonmetastatic papillary thyroid carcinoma. Published online April 27, 2017. *JAMA Otolaryngol Head Neck Surg*. doi:10.1001/jamaoto.2017.0550

**eFigure.** Five-Year Survival Curves by Different Staging Systems in the Siteman Cancer Registry and NCDB

This supplementary material has been provided by the authors to give readers additional information about their work.

Figure 1. Five-Year Survival Curves by Different Staging Systems in the Siteman Cancer Registry and National Cancer Database

Siteman Cancer Registry

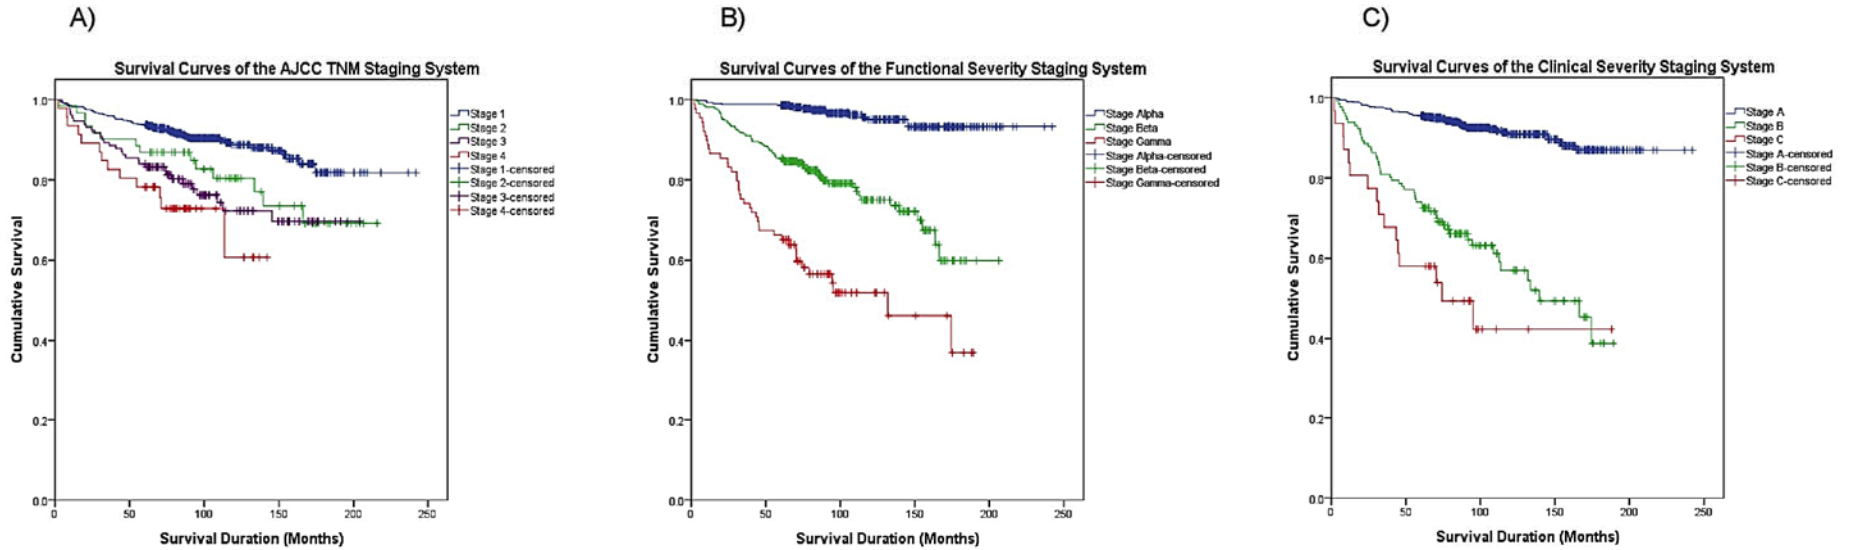

National Cancer Database

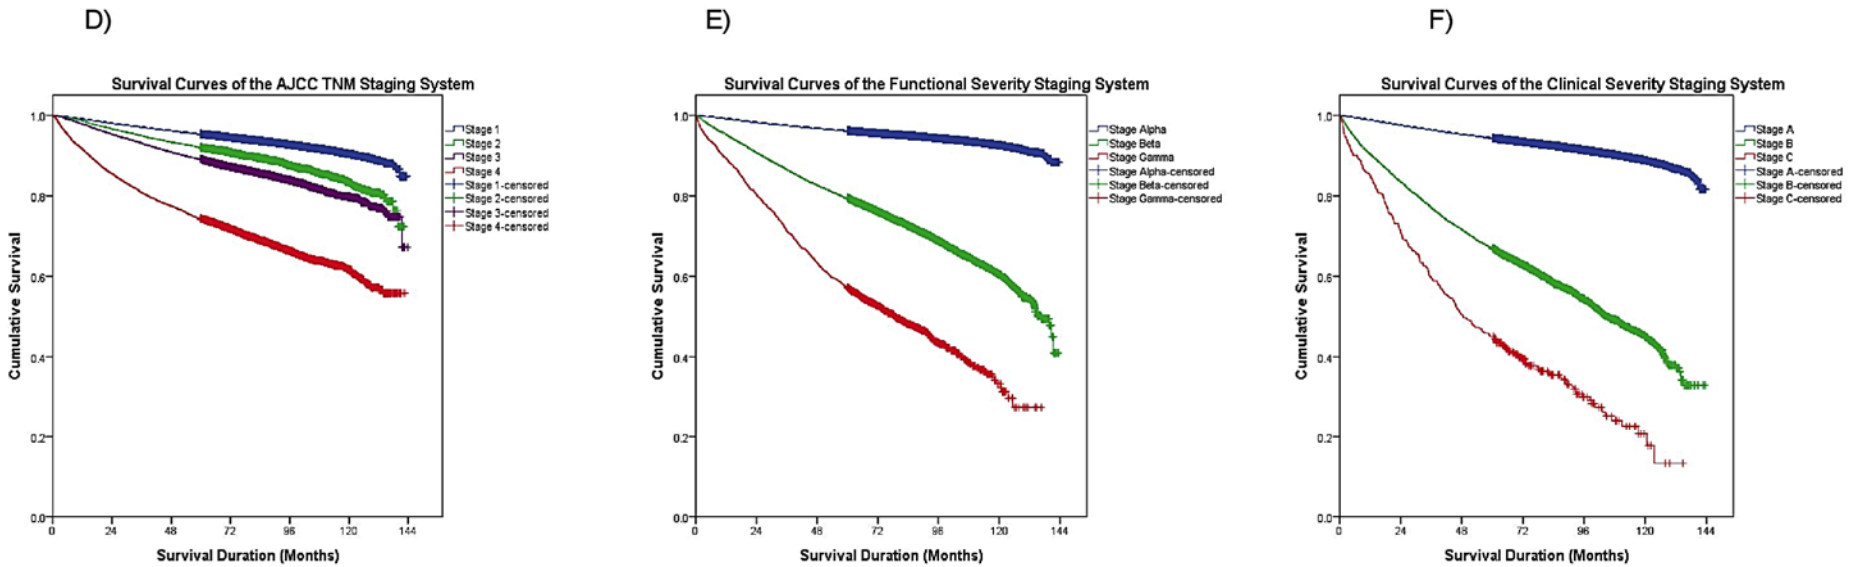

Siteman Cancer Registry: A, Kaplan-Meier overall survival curves of the AJCC TNM Staging System. B, Kaplan-Meier overall survival curves of the Functional Severity Staging System. C, Kaplan-Meier overall survival curves of the Clinical Severity Staging System. National Cancer Database: D, Kaplan-Meier overall survival curves of the AJCC TNM Staging System. E, Kaplan-Meier overall survival curves of the Functional Severity Staging System. F, Kaplan-Meier overall survival curves of the Clinical Severity Staging System.
